# Supplementary material for: Deep Batch Integration and Denoise of Single‐Cell RNA‐Seq Data
Source: PubMed Central journal article supplement (PMC11304254; doi:10.1002/advs.202308934), 2024-05-22
Supplement: ADVS-11-2308934-s002.pdf [file ADVS-11-2308934-s002.pdf]

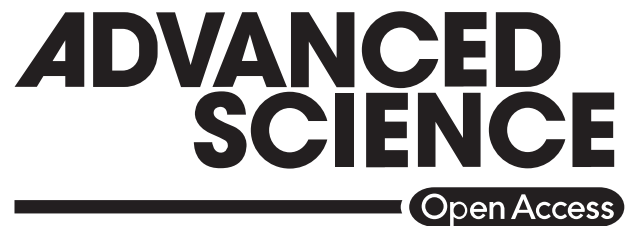

## Supporting Information

for *Adv. Sci.*, DOI 10.1002/adv.202308934

Deep Batch Integration and Denoise of Single-Cell RNA-Seq Data

*Lu Qin, Guangya Zhang, Shaoqiang Zhang\* and Yong Chen\**

## SUPPLEMENTARY MATERIALS

### Deep Batch Integration and Denoise of Single-Cell RNA-seq Data

Lu Qin<sup>1</sup>, Guangya Zhang<sup>1</sup>, Shaoqiang Zhang<sup>1\*</sup>, Yong Chen<sup>2\*</sup>

<sup>1</sup>College of Computer and Information Engineering, Tianjin Normal University, Tianjin 300387, China

<sup>2</sup>Department of Biological and Biomedical Sciences, Rowan University, NJ 08028, USA

\* To whom correspondence should be addressed:

S. Zhang (zhangshaoqiang@tjnu.edu.cn); Y. Chen (chenyong@rowan.edu)

### **This supplementary file includes Table S1-S6, Figure S1-S5.**

Table S1. Detailed information of scRNA-seq datasets used.

Table S2. The median iLISI scores of each dataset integrated by each method.

Table S3. The median cLISI scores of each dataset integrated by each method.

Table S4. The ARI and NMI scores of each dataset after batch integration and clustering.

Table S5. Running time comparison of six methods across five datasets.

Table S6. Core code used by five methods for batch integration and clustering.

Figure S1. NMI scores for seven different  $\kappa_1$  settings across five datasets with fixed values of  $\lambda_1$ ,  $\lambda_2$  and  $\kappa_2$ .

Figure S2. NMI scores for seven different  $\kappa_2$  settings across five datasets with fixed values of  $\lambda_1$ ,  $\lambda_2$  and  $\kappa_1$ .

Figure S3. UMAP plots on the "DC" dataset that has 4 cell types.

Figure S4. UMAP plots on the "Pancreas" dataset that has 17 cell types.

Figure S5. UMAP plots on the "PBMCs" dataset that has 15 cell types.

**Supplementary Table S1.** Detailed information of used scRNA-seq datasets. CT: Cell Types.

| Name        | Data Source                        | Platforms         | URL                                                                                                                                                                                                     | # Cell | # CT |
|-------------|------------------------------------|-------------------|---------------------------------------------------------------------------------------------------------------------------------------------------------------------------------------------------------|--------|------|
| DC          | Human dendritic cells              | SMART-seq2        | <a href="https://www.ncbi.nlm.nih.gov/geo/query/acc.cgi?acc=GSE94820">https://www.ncbi.nlm.nih.gov/geo/query/acc.cgi?acc=GSE94820</a>                                                                   | 286    | 4    |
|             |                                    | SMART-seq2        |                                                                                                                                                                                                         | 283    |      |
| Cell_lines  | Jurkat                             | 10X Genomics      | <a href="https://support.10xgenomics.com/single-cell-gene-expression/datasets/1.1.0/jurkat">https://support.10xgenomics.com/single-cell-gene-expression/datasets/1.1.0/jurkat</a>                       | 3258   | 2    |
|             | HEK293T                            | 10X Genomics      | <a href="https://support.10xgenomics.com/single-cell-gene-expression/datasets/1.1.0/293t">https://support.10xgenomics.com/single-cell-gene-expression/datasets/1.1.0/293t</a>                           | 2885   |      |
|             | 50% Jurkat + 50% HEK293T           | 10X Genomics      | <a href="https://support.10xgenomics.com/single-cell-gene-expression/datasets/1.1.0/jurkat:293t_50:50">https://support.10xgenomics.com/single-cell-gene-expression/datasets/1.1.0/jurkat:293t_50:50</a> | 3388   |      |
| Sc_mixology | Mixture of HCC827, H1975 and H2228 | 10X Genomics      | <a href="https://github.com/LuyiTian/sc_mixology">https://github.com/LuyiTian/sc_mixology</a>                                                                                                           | 902    | 3    |
|             |                                    | CEL-seq2          |                                                                                                                                                                                                         | 274    |      |
|             |                                    | Drop-seq          |                                                                                                                                                                                                         | 225    |      |
| PBMCs       | 3pV1                               | 10X Genomics (3') | <a href="https://support.10xgenomics.com/single-cell-gene-expression/datasets/1.1.0/pbmc6k">https://support.10xgenomics.com/single-cell-gene-expression/datasets/1.1.0/pbmc6k</a>                       | 5419   | 15   |
|             | 3pV2                               | 10X Genomics (3') | <a href="https://support.10xgenomics.com/single-cell-gene-expression/datasets/2.1.0/pbmc8k">https://support.10xgenomics.com/single-cell-gene-expression/datasets/2.1.0/pbmc8k</a>                       | 8381   |      |
|             | 5p                                 | 10X Genomics (5') | <a href="https://support.10xgenomics.com/single-cell-vdj/datasets/2.2.0/vdj_v1_hs_pbmc_5gex">https://support.10xgenomics.com/single-cell-vdj/datasets/2.2.0/vdj_v1_hs_pbmc_5gex</a>                     | 7726   |      |
| Pancreas    | Human pancreatic islet cells       | CEL-seq           | <a href="https://www.ncbi.nlm.nih.gov/geo/query/acc.cgi?acc=GSE81076">https://www.ncbi.nlm.nih.gov/geo/query/acc.cgi?acc=GSE81076</a>                                                                   | 946    | 11   |
|             |                                    | CEL-seq2          | <a href="https://www.ncbi.nlm.nih.gov/geo/query/acc.cgi?acc=GSE85241">https://www.ncbi.nlm.nih.gov/geo/query/acc.cgi?acc=GSE85241</a>                                                                   | 2238   |      |
|             |                                    | SMART-seq2        | <a href="https://www.ebi.ac.uk/gxa/sc/experiments/EMTAB-5061/">https://www.ebi.ac.uk/gxa/sc/experiments/EMTAB-5061/</a>                                                                                 | 2114   |      |
|             |                                    | Fluidigm C1       | <a href="https://www.ncbi.nlm.nih.gov/geo/query/acc.cgi?acc=GSE86469">https://www.ncbi.nlm.nih.gov/geo/query/acc.cgi?acc=GSE86469</a>                                                                   | 513    |      |
|             |                                    | inDrops           | <a href="https://www.ncbi.nlm.nih.gov/geo/query/acc.cgi?acc=GSE84133">https://www.ncbi.nlm.nih.gov/geo/query/acc.cgi?acc=GSE84133</a>                                                                   | 8564   |      |

**Supplementary Table S2.** The median iLISI scores of each dataset after batch integration.

| Method\Dataset | DC           | Cell_lines   | Sc_mixology  | Pancreas     | PBMCs        |
|----------------|--------------|--------------|--------------|--------------|--------------|
| DeepBID        | <b>1.379</b> | <b>1.429</b> | 1.000        | <b>2.475</b> | <b>2.728</b> |
| Harmony        | 1.163        | 1.000        | 1.000        | 1.000        | 1.178        |
| Seurat         | 1.175        | 1.004        | 1.000        | 1.020        | 1.012        |
| LIGER          | 1.071        | 1.370        | <b>1.273</b> | 1.011        | 1.073        |
| scVI           | 1.302        | 1.259        | 1.012        | 1.000        | 1.029        |
| DESC           | 1.016        | 1.000        | 1.000        | 1.000        | 1.857        |

**Supplementary Table S3.** The median cLISI scores of each dataset after batch integration.

| Method\Dataset | DC           | Cell_lines   | Sc_mixology  | Pancreas     | PBMCs        |
|----------------|--------------|--------------|--------------|--------------|--------------|
| DeepBID        | <b>1.845</b> | 3.098        | <b>2.466</b> | <b>2.862</b> | 4.728        |
| Harmony        | 2.055        | 1.947        | 3.045        | 3.014        | 4.153        |
| Seurat         | 2.016        | <b>1.649</b> | 3.977        | 2.885        | 3.593        |
| LIGER          | 1.973        | 7.684        | 6.794        | 2.885        | 7.022        |
| scVI           | 1.973        | 4.691        | 4.609        | 3.323        | 6.590        |
| DESC           | 1.982        | 2.923        | 4.553        | 3.098        | <b>3.098</b> |

**Supplementary Table S4.** The ARI and NMI scores of each dataset after batch integration and clustering.

| Datasets | Indices | Harmony | Seurat  | LIGER   | scVI    | DESC    | DeepBID        |
|----------|---------|---------|---------|---------|---------|---------|----------------|
| DC       | NMI     | 0.65246 | 0.73514 | 0.84188 | 0.65721 | 0.80453 | <b>0.84437</b> |
|          | ARI     | 0.78790 | 0.84787 | 0.63021 | 0.78302 | 0.87448 | <b>0.89067</b> |

|             |     |         |         |         |         |         |                |
|-------------|-----|---------|---------|---------|---------|---------|----------------|
| Sc_mixology | NMI | 0.48738 | 0.60919 | 0.56768 | 0.55534 | 0.74793 | <b>0.98498</b> |
|             | ARI | 0.44375 | 0.61212 | 0.29195 | 0.38914 | 0.27613 | <b>0.99146</b> |
| Cell_lines  | NMI | 0.58549 | 0.36147 | 0.37397 | 0.22004 | 0.51159 | <b>0.97854</b> |
|             | ARI | 0.44557 | 0.31408 | 0.07088 | 0.13607 | 0.36330 | <b>0.99821</b> |
| PBMCs       | NMI | 0.71250 | 0.57896 | 0.60484 | 0.69486 | 0.68155 | <b>0.72594</b> |
|             | ARI | 0.63037 | 0.42125 | 0.43478 | 0.70293 | 0.48305 | <b>0.73191</b> |
| Pancreas    | NMI | 0.65348 | 0.68489 | 0.45291 | 0.69524 | 0.70117 | <b>0.71923</b> |
|             | ARI | 0.36379 | 0.46508 | 0.60950 | 0.50869 | 0.23283 | <b>0.62265</b> |

**Supplementary Table S5.** Running time comparison of six methods across five datasets. The cell numbers for each dataset are provided in parentheses, and the running time is measured in seconds (s). The running time of each tool was recorded for their core code processing, excluding data preprocessing time.

| Name    | DC (569) | Sc_mixology (1401) | Cell_lines (9531) | Pancreas (14375) | PBMCs (21526) |
|---------|----------|--------------------|-------------------|------------------|---------------|
| DeepBID | 4.45s    | 7.85s              | 140.94s           | 302.3s           | 416.5s        |
| Harmony | 1.76s    | 2.4s               | 40.9s             | 85.1s            | 93.7s         |
| Seurat  | 1.09s    | 1.62s              | 21.59s            | 24.87s           | 40.83s        |
| LIGER   | 59.51s   | 74s                | 210s              | 417.51s          | 482.86s       |
| DESC    | 31.4s    | 31.9s              | 326.5s            | 574.3s           | 586.1s        |
| scVI    | 14.9s    | 38.9s              | 326.2s            | 667.3s           | 883.4s        |

**Supplementary Table S6.** Core code used by five methods for batch integration and clustering.

| Method  | Core code                                                                                                                                                                                                                                                                                                                                                                                                                                                                                                                                  |
|---------|--------------------------------------------------------------------------------------------------------------------------------------------------------------------------------------------------------------------------------------------------------------------------------------------------------------------------------------------------------------------------------------------------------------------------------------------------------------------------------------------------------------------------------------------|
| LIGER   | <pre> scRNA_liger &lt;- merge(batches) scRNA_liger &lt;- NormalizeData(scRNA_liger) scRNA_liger &lt;- FindVariableFeatures(scRNA_liger) scRNA_liger &lt;- ScaleData(scRNA_liger, split.by = "orig.ident", do.center = F) scRNA_liger &lt;- RunOptimizeALS(scRNA_liger, k = 30, lambda = 5, split.by = "orig.ident") scRNA_liger &lt;- RunQuantileNorm(scRNA_liger, split.by = "orig.ident") scRNA_liger &lt;- FindNeighbors(scRNA_liger, reduction = "tSNE", k.param = 10, dims = 1:30) scRNA_liger &lt;- FindClusters(scRNA_liger) </pre> |
| Seurat  | <pre> scRNA_anchors &lt;- FindIntegrationAnchors(object.list = scRNA.list) scRNA_seurat &lt;- IntegrateData(anchorset = scRNA_anchors) scRNA_seurat &lt;- RunUMAP(scRNA_seurat, dims = 1:30) scRNA_seurat &lt;- FindNeighbors(scRNA_seurat, dims = 1:30) %&gt;% FindClusters() </pre>                                                                                                                                                                                                                                                      |
| Harmony | <pre> scRNA_harmony &lt;- merge(batches) scRNA_harmony &lt;- NormalizeData(scRNA_harmony) %&gt;% FindVariableFeatures() %&gt;% ScaleData() %&gt;% RunPCA(verbose=FALSE) scRNA_harmony &lt;- RunHarmony(scRNA_harmony, group.by.vars = "orig.ident") scRNA_harmony &lt;- RunUMAP(scRNA_harmony, reduction = "harmony", dims = 1:30) scRNA_harmony &lt;- FindNeighbors(scRNA_harmony, reduction = "harmony", dims = 1:30) %&gt;% FindClusters() </pre>                                                                                       |
| DESC    | <pre> scanpy.pp.scale(adata,max_value=6) # require scanpy save_dir="" adata=DESC.train(adata, dims=[adata.shape[1],64,32], tol=0.005, n_neighbors=10, batch_size=256, louvain_resolution=[0.8,1.0], save_dir=str(save_dir), do_tsne=True, learning_rate=200, use_GPU=True, num_Cores=1, num_Cores_tsne=4, save_encoder_weights=False, save_encoder_step=3, use_ae_weights=False, do_umap=False) </pre>                                                                                                                                     |
| scVI    | <pre> scanpy.pp.highly_variable_genes(adata, flavor="seurat_v3", n_top_genes=2000, layer="norm_data", batch_key="batch", subset=True,) scvi.model.SCVI.setup_anndata(adata,batch_key="batch") vae = scvi.model.SCVI(adata, n_layers=2, n_latent=30, gene_likelihood="nb") vae.train() </pre>                                                                                                                                                                                                                                               |

**Supplementary Figure S1.** NMI scores for seven different  $\kappa_1$  settings across five datasets with fixed values of  $\lambda_1$ ,  $\lambda_2$  and  $\kappa_2$ .

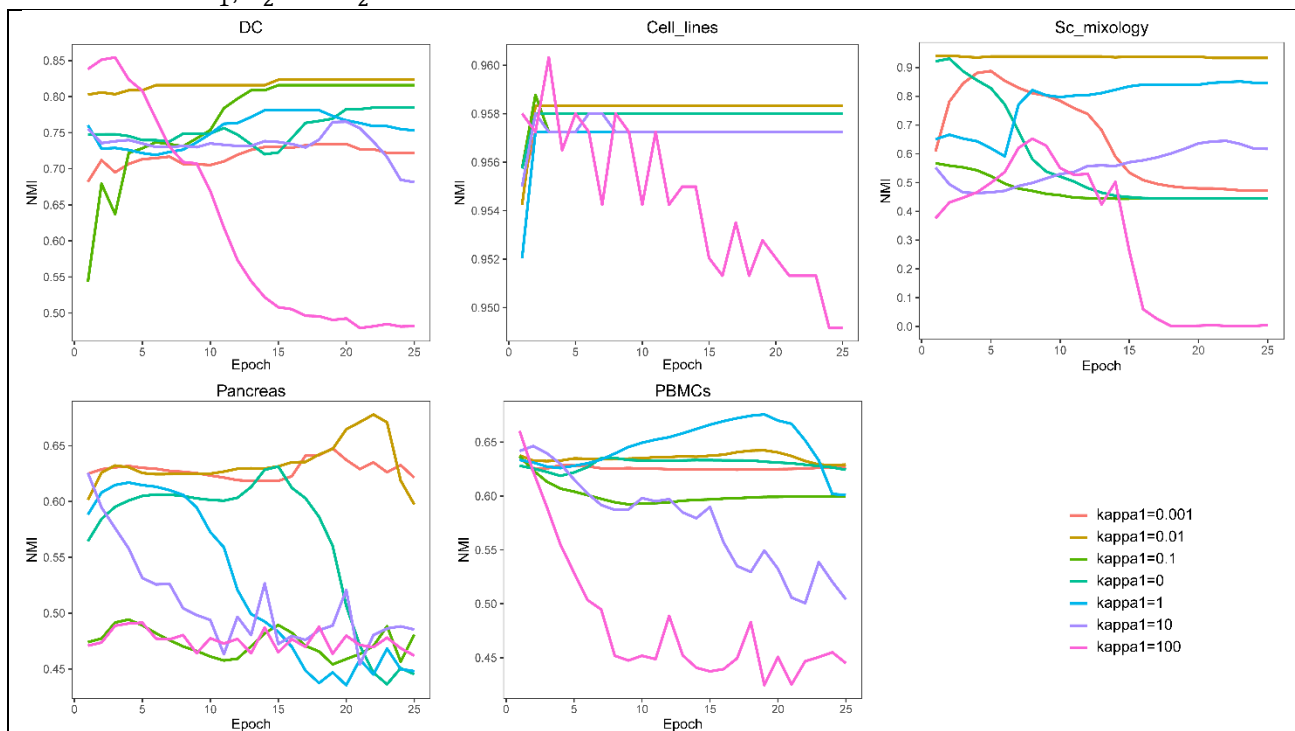

**Supplementary Figure S2.** NMI scores for seven different  $\kappa_2$  settings across five datasets with fixed values of  $\lambda_1$ ,  $\lambda_2$  and  $\kappa_1$ .

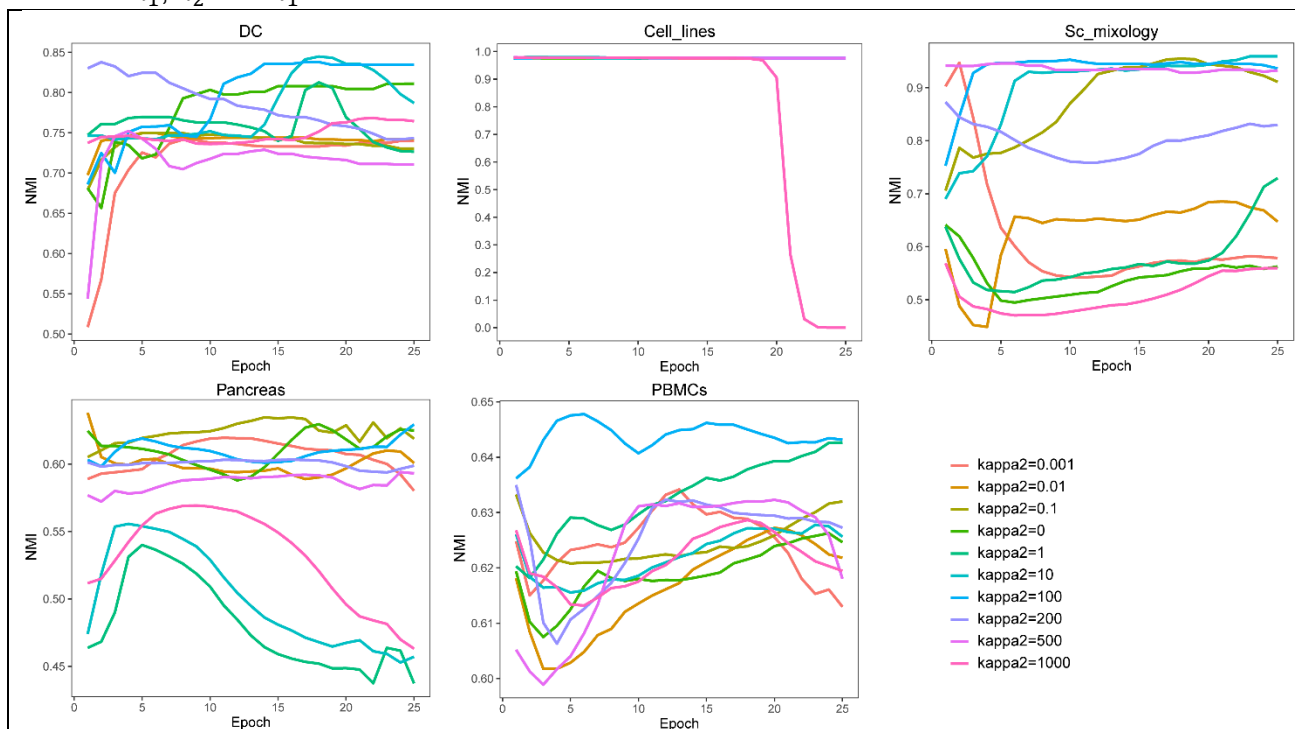

**Supplementary Figure S3.** UMAP plots on the “DC” dataset that has 4 cell types. The first column illustrates the original cell type labels by method, the second column displays the labels for 2 batches, and the third column shows the clustering outcomes after batch effect removal.

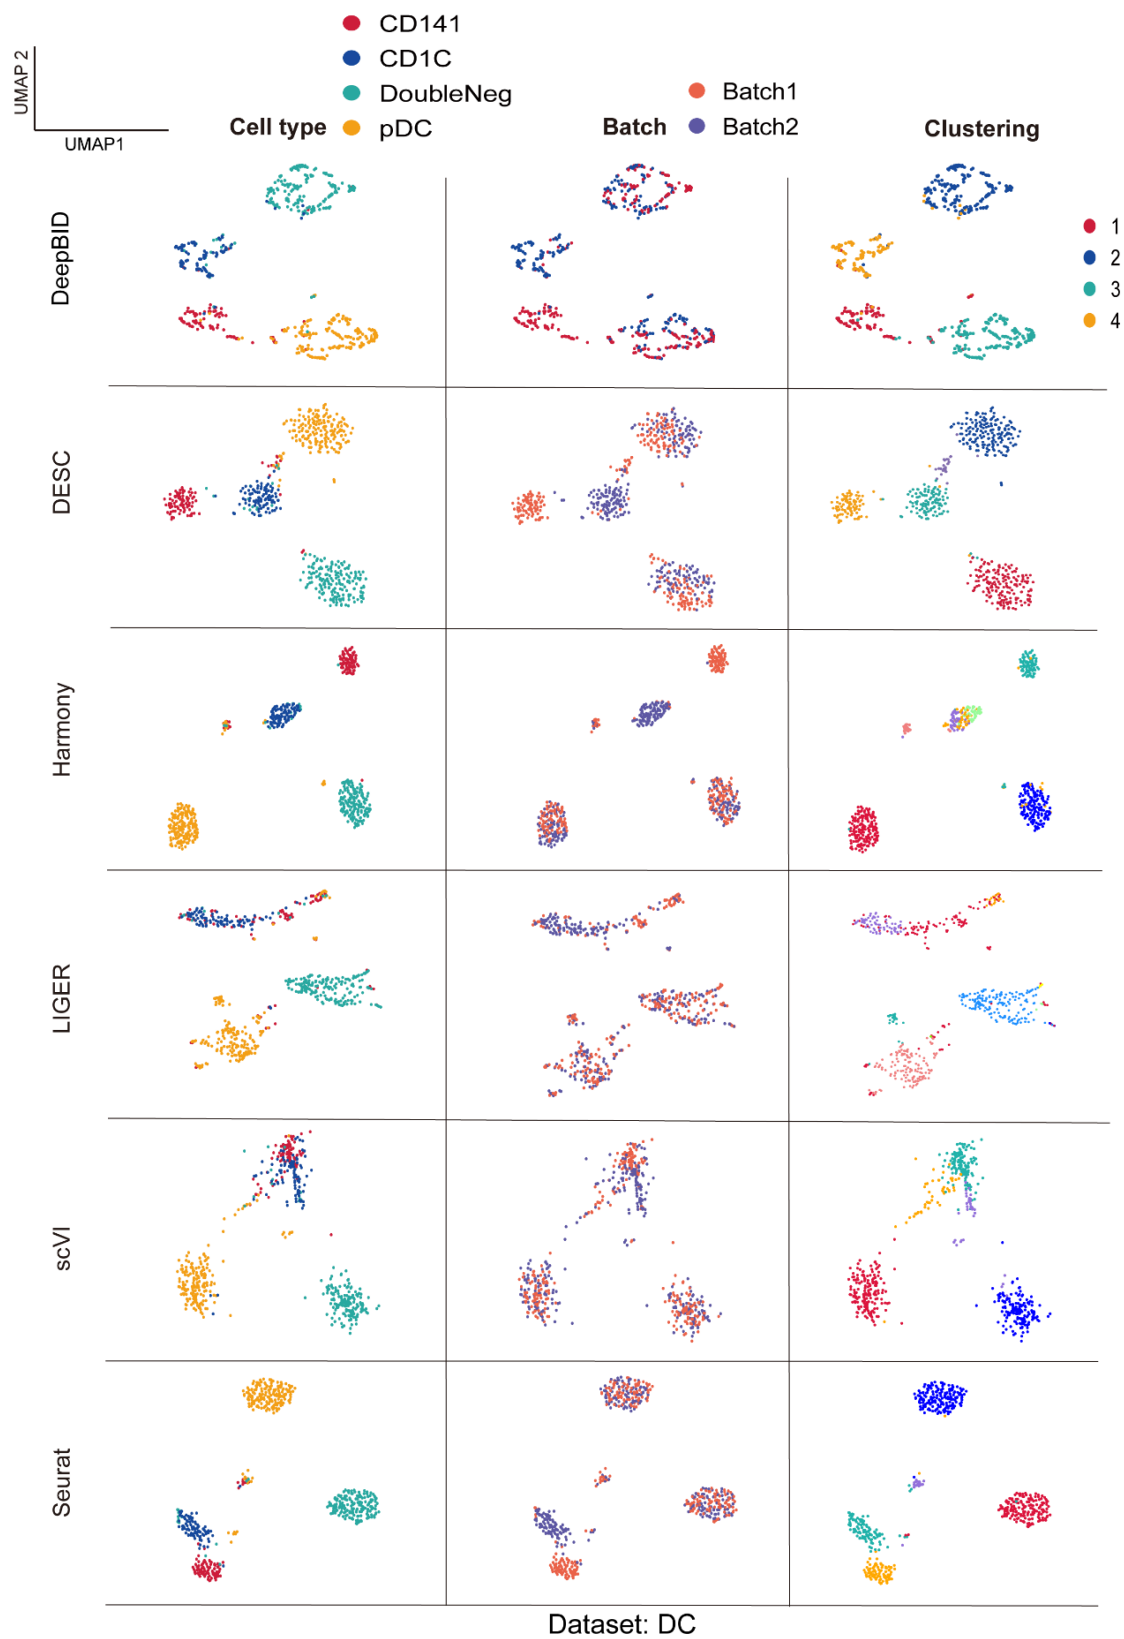

**Supplementary Figure S4.** UMAP plots on the “Pancreas” dataset that has 17 cell types. The first column illustrates the original cell type labels for each method, the second column displays the labels for 5 batches, and the third column shows the clustering outcomes after batch effect removal.

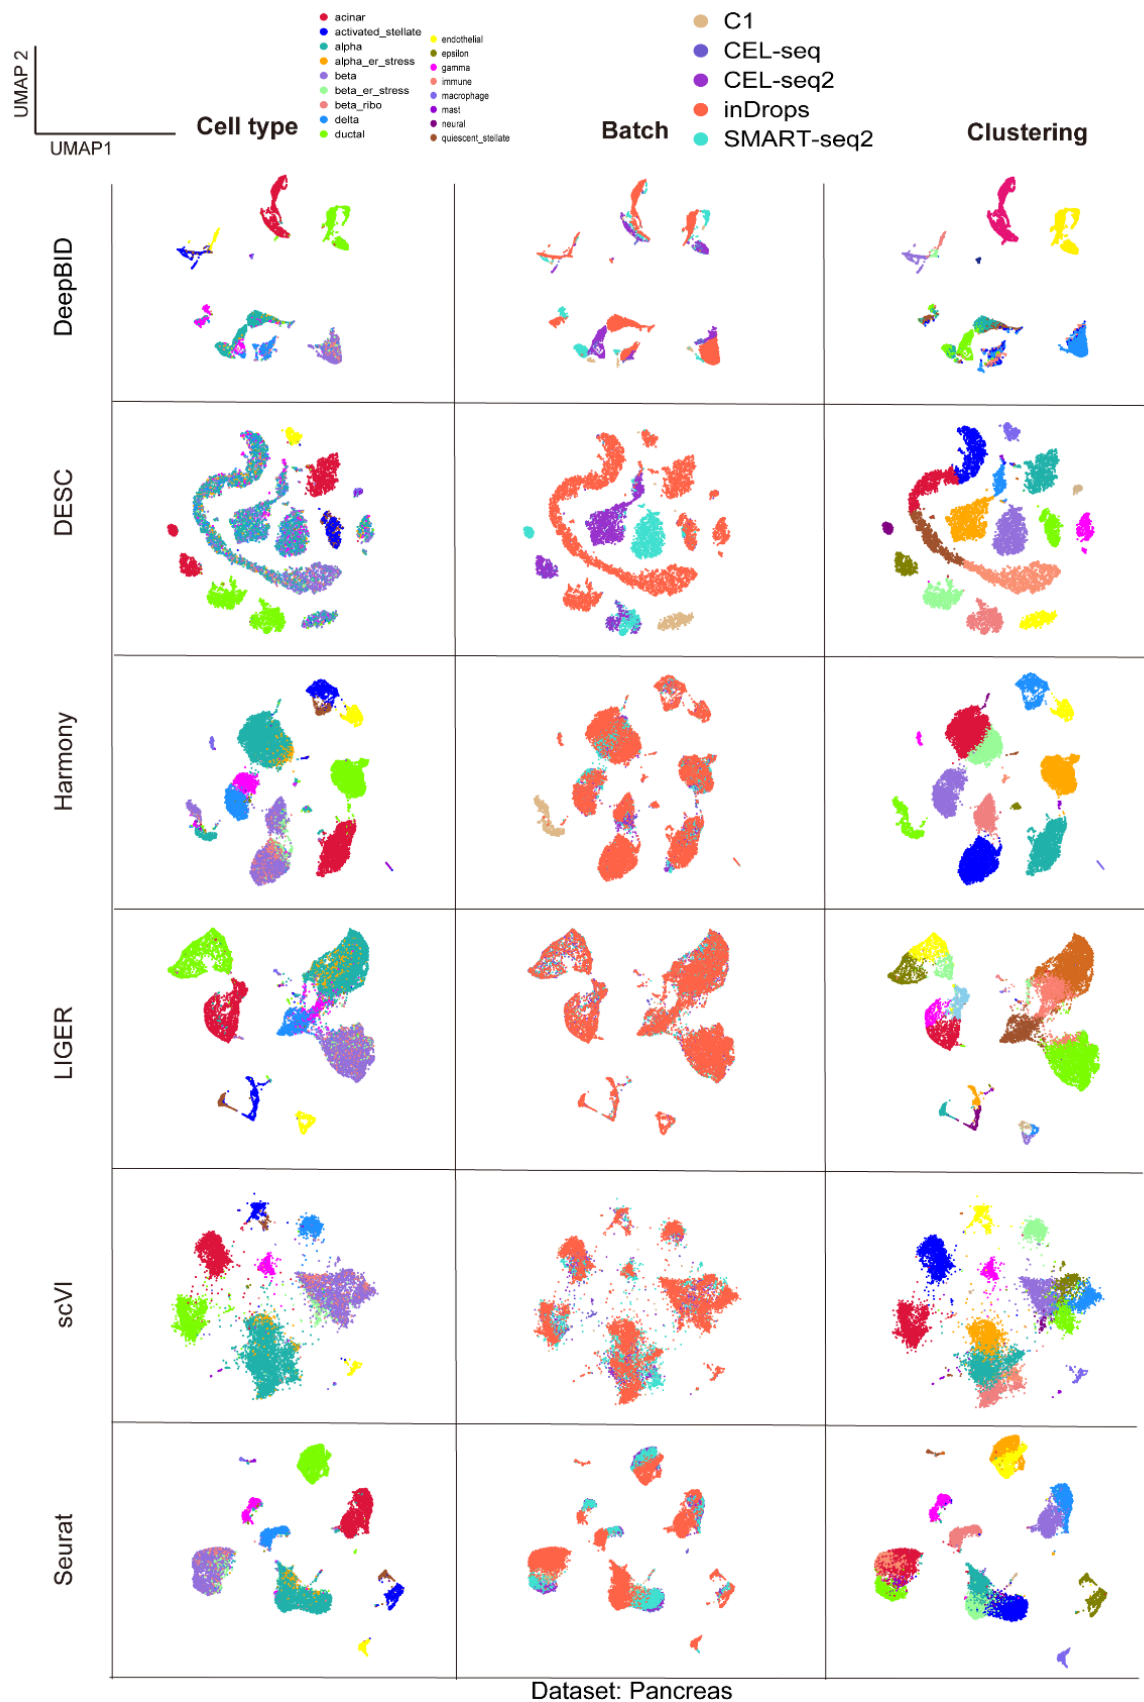

**Supplementary Figure S5.** UMAP plots on the “PBMCs” dataset that has 15 cell types. The first column illustrates the original cell type labels for each method, the second column displays the labels for 3 batches, and the third column shows the clustering outcomes after batch effect removal.

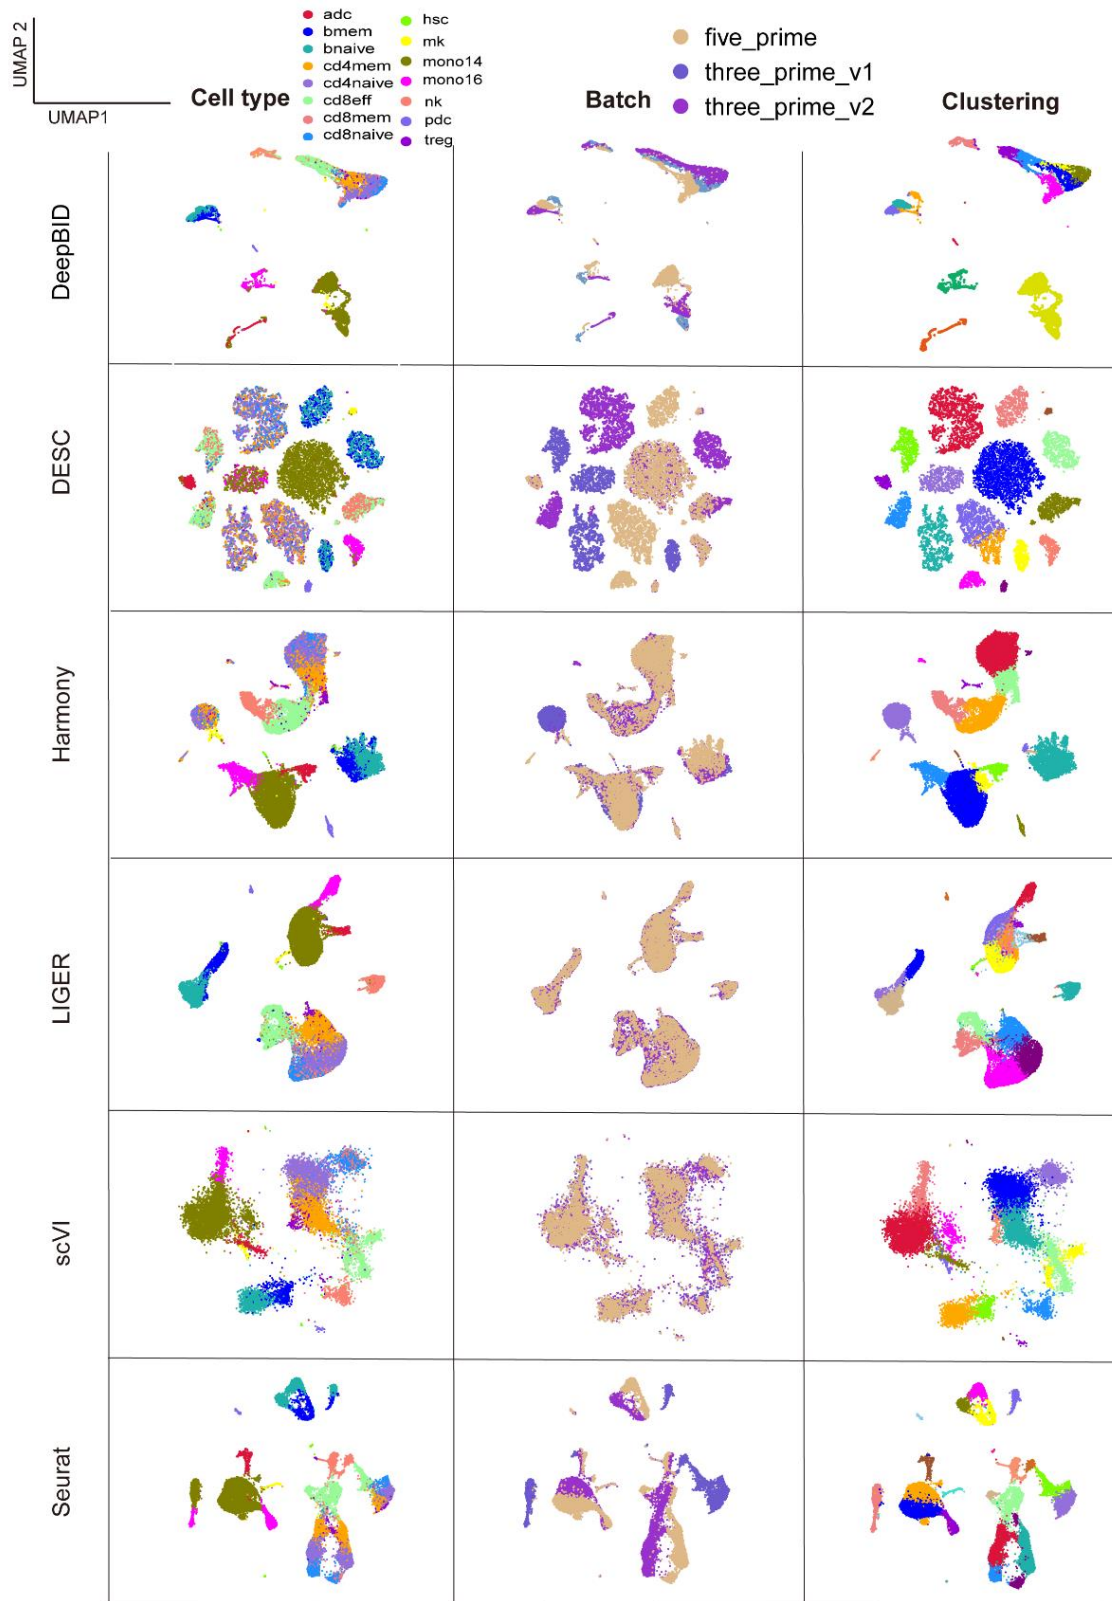

Dataset: PBMCs
